# Supplementary material for: The Impacts of Covid-19 on Circular Economy: Gaining Insight across the SCOPUS and Web of Science Research Articles with Text Mining Techniques
Source: Preprints.org preprint supplement (doi:10.20944/preprints202102.0447.v1), 2021-02-20
Supplement: Supplementary file 1 [file supplementary]

**Dear,**

Academic Editors of Scientifica

Donna Llanto, Editorial Screener

We wish to submit a review article entitled "The impacts of Covid-19 on circular economy: Gaining insight across the SCOPUS and Web of Science research articles with Text Mining techniques." for Scientifica (ISSN: 2090-908X). I confirm that this manuscript is not considered for publication elsewhere.

We believe the finding of this result will appeal to Scientifica's readers and the scholarly community, specifically in public health and environmental science. We find that the pandemic undoubtedly has negative consequences on all three aspects of the circular economy. The problems are not limited to the health and environmental trade-off from one-time-use plastics, the economy and health trade-off from lockdown or economy and social interchange from million job loss and business shutdown.

Our research identifies the research gaps in current literature, such as the lack of empirical research and cost-benefit analysis of the circular economy strategies on combating Covid-19. Researchers should also analyze the opportunities and challenges to promote a circular economy from customers' and citizen perspectives during and after the pandemic. Finally, researchers should also concentrate on developing countries and regional areas beyond Europe. We suggest and create a framework to employ Voyant Tools for systematic review as a textual analysis technique on theoretical novelty.

On practical novelty, the paper summarizes the best practices and strategies to combat Covid-19 for policymakers and business owners, such as localization, agile manufacturing (aforementioned) and frugal innovation, and blockchain technology (BCT)-enabled design. These practices may guide businesses toward sustainability operation even in the Covid-19 situation.

Thank you for your consideration.

Khoa Tran and Tuyet Nguyen
